# Supplementary material for: Carbonates as reactants for the production of fine chemicals: the synthesis of 2-phenoxyethanol
Source: Royal Society of Chemistry journal article supplement (doi:10.1039/c4cy00913d), 2014-01-01
Supplement: c4cy00913d1.pdf [file c4cy00913d1.pdf]

## SUPPORTING INFORMATION

### Carbonates as reactants for the production of fine chemicals: the synthesis of 2-phenoxyethanol

P. Ziosi<sup>a,b</sup>, T. Tabanelli<sup>a</sup>, G. Fornasari<sup>a</sup>, S. Cocchi<sup>a</sup>, F. Cavani<sup>a,b,\*</sup>, P. Righi<sup>a,b,\*</sup>

#### NMR spectra of products

Chemical shifts ( $\delta$ ) for  $^1\text{H}$  and  $^{13}\text{C}$  are given in ppm relative to residual signal of the solvent (7.26 ppm). The following abbreviations are used to indicate the multiplicity s, singlet; d, doublet; t, triplet; q, quartet; m, multiplet; bs, broad signal.

#### 2-phenoxy-1-ethanol (PE)

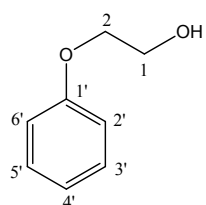

$^1\text{H}$  NMR (300 MHz,  $\text{CDCl}_3$ )  $\delta$  (ppm): 7.34-6.89 (5H, *m*, Ar), 4.09 (2H, *m*, C 2), 3.96 (2H, *m*, C 1), 2.04 (1H, *bs*, OH).

$^{13}\text{C}$  NMR (75 MHz,  $\text{CDCl}_3$ )  $\delta$  (ppm): 158.7 (C 1'), 129.7 (C 3-5'), 121.3 (C 4'), 114.7 (C 2'-6'), 69.2 (C 2), 61.7 (C 1).

#### 2-(2-phenoxyethoxy)ethanol (DPE)

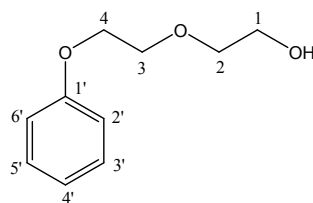

$^1\text{H}$  NMR (300 MHz,  $\text{CDCl}_3$ )  $\delta$  (ppm): 7.34-6.89 (5H, *m*, Ar), 4.09 (2H, *m*, C 4), 3.96 (2H, *m*, C 3), 3.69 (2H, *m*, C 2), 3.59 (2H, *m*, C 1), 2.04 (1H, *bs*, OH).

#### bis(2-phenoxyethyl)carbonate (BPEC)

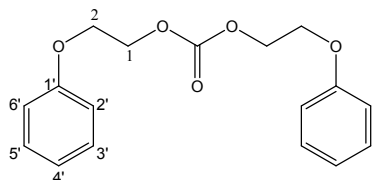

$^1\text{H}$  NMR (300 MHz,  $\text{CDCl}_3$ )  $\delta$  (ppm): 7.32-6.89 (10H, *m*, Ar), 4.52 (4H, *m*, C 2), 4.21 (4H, *m*, C 1).

$^{13}\text{C}$  NMR (75 MHz,  $\text{CDCl}_3$ )  $\delta$  (ppm): 158.5 (C 1'), 155.2 ( $\text{CO}_3$ ), 129.6 (C 3'-5'), 121.4 (C 4'), 114.7 (C 2'-6'), 66.5 (C 2), 65.6 (C 1).

The assignment of the structure to BPEC was based on the fact that (i) its  $^1\text{H}$  NMR spectrum does not show a signal attributable to a hydroxyl moiety, (ii) the two  $\text{CH}_2$  moieties are strongly deshielded, (iii) its  $^{13}\text{C}$  NMR shows a quaternary C atom at 155.2 ppm, and (iv) the ESI spectrum shows a peak at  $m/z=302$ . All this strongly suggests the structure of a symmetrical carbonate such as BPEC.

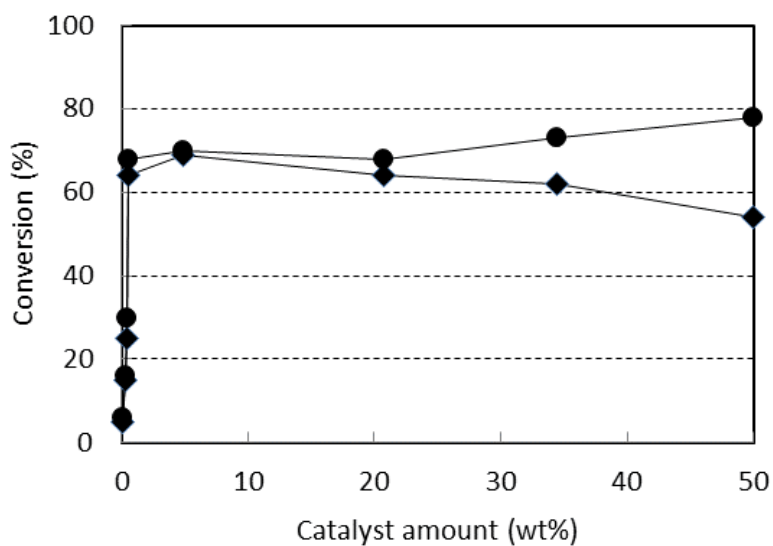

**Figure S1** Effect of the catalyst amount (weight in respect to the phenol) on phenol conversion (⊕) and EC conversion (⊗). Reaction conditions: T 210°C, reaction time 7 h, feed ratio phenol/EC 1/1; catalyst Na-mordenite.

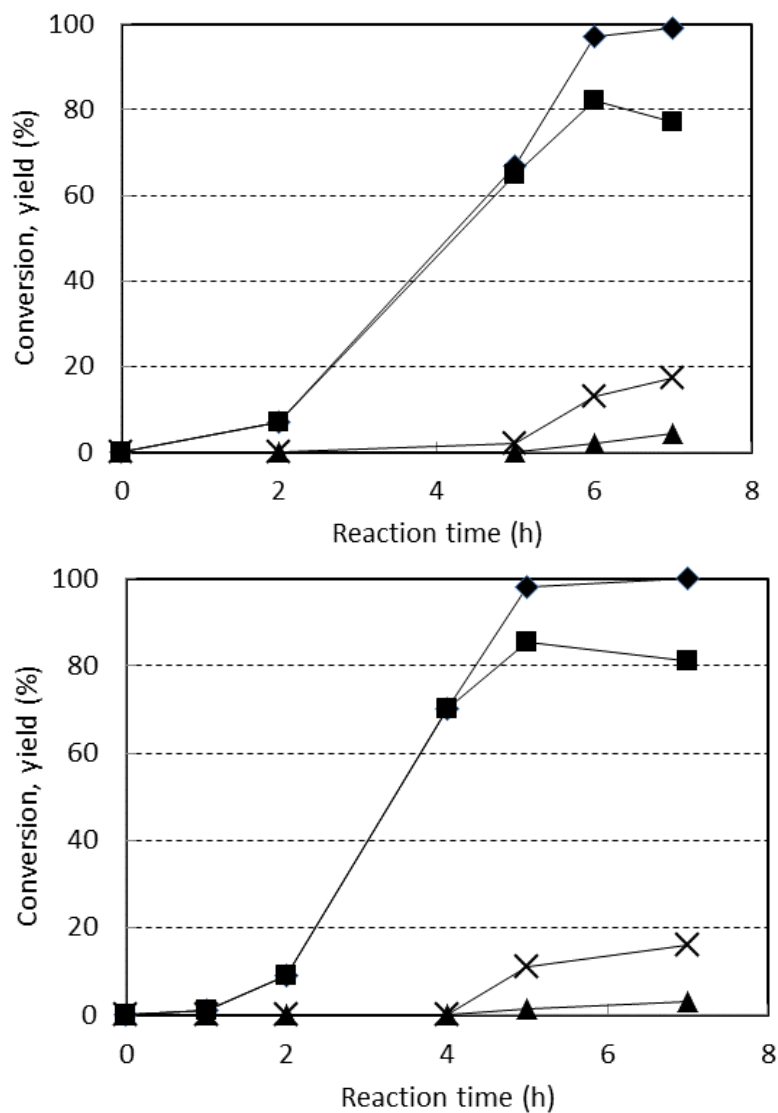

**Figure S2** Effect of reaction time on phenol conversion (⊕), and yield to PE (⊙), DPE+TPE (⊠), and BPEC (⊗). Reaction conditions: catalyst amount 0.5 wt% (top), and 5 wt% (bottom); T 210°C, phenol/EC feed ratio 1/2, catalyst treated Na-mordenite.
